# Supplementary material for: Role of Liver X Receptor in AD Pathophysiology
Source: PubMed Central journal article supplement (PMC4697813; doi:10.1371/journal.pone.0145467), 2015-12-31
Supplement: pone.0145467.s001.pdf [file pone.0145467.s001.pdf]

**Figure S1.**

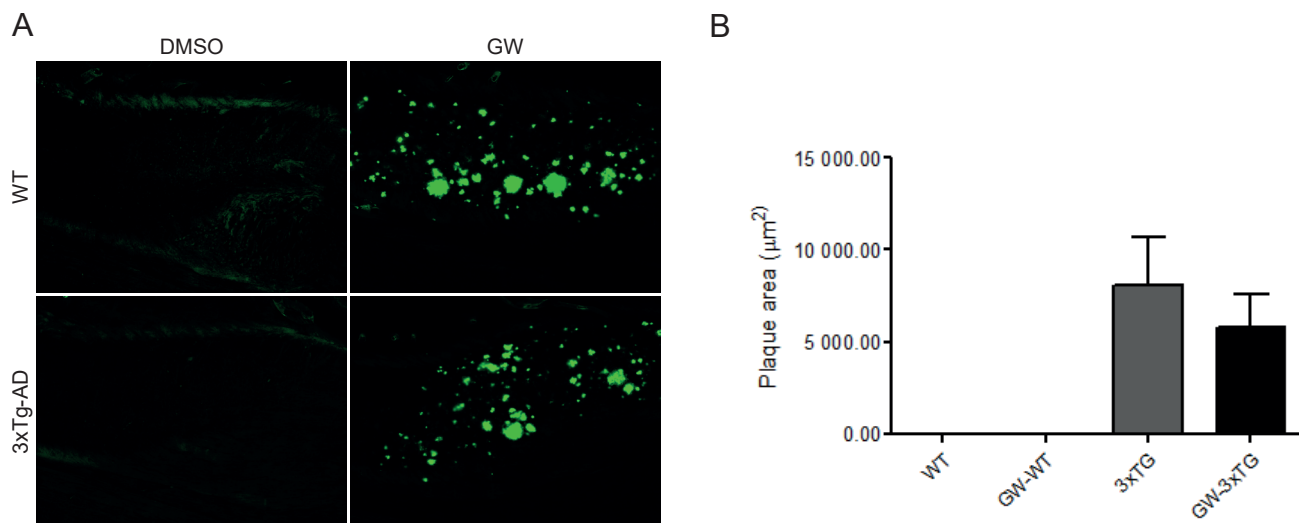

**Figure S1. No detectable reduction in amyloid beta.** Amyloid plaque deposition in brains of treated and untreated mice groups were evaluated by Thio-S staining. **(A-B)** Representative micrographs of brain stained sections. Data were expressed as mean  $\pm$  S.E.M. Statistical analysis was done by one way ANOVA followed by Tukey's multiple comparison test. n=4 per group.
