# Supplementary material for: Role of Liver X Receptor in AD Pathophysiology
Source: PubMed Central journal article supplement (PMC4697813; doi:10.1371/journal.pone.0145467), 2015-12-31
Supplement: pone.0145467.s003.pdf [file pone.0145467.s003.pdf]

Figure S3

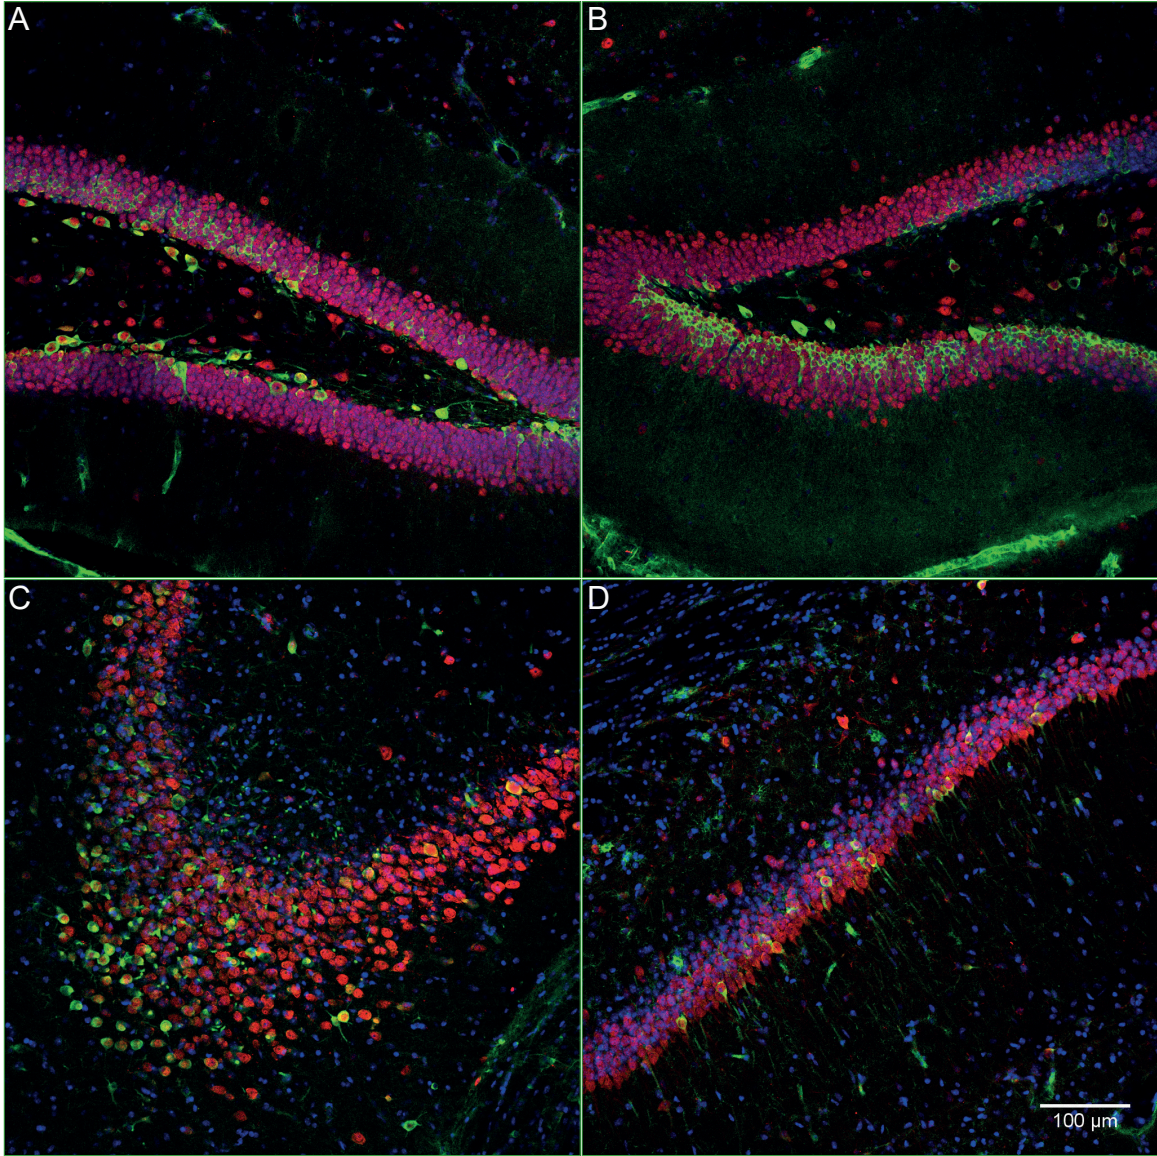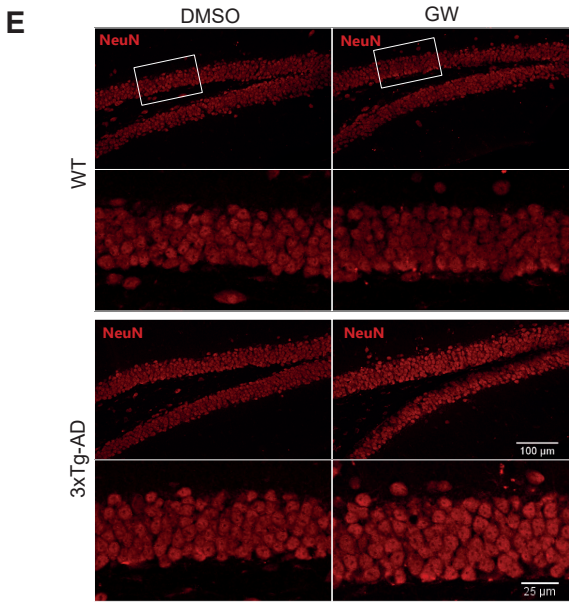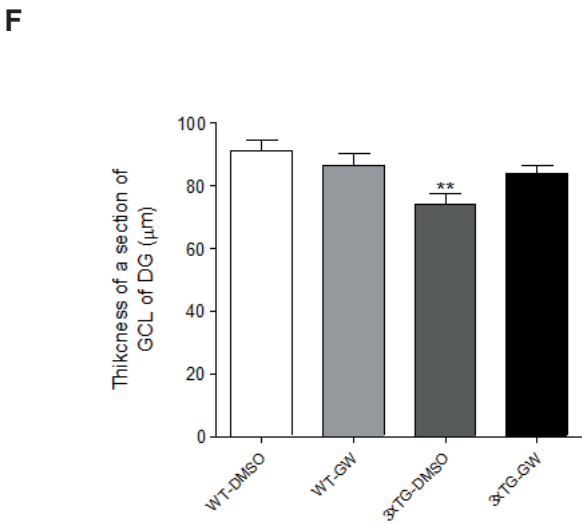

**Figure S3. LXR agonist increases ApoE in NeuN positive cell without any increase of the neuronal cells number. (A-D)** Representative micrographs of NeuN(Red), ApoE (Green) immunofluorescence and Hoechst (Blue) using confocal microscopy on x20 of magnification in DG, CA3 and CA1 of the hippocampus. **(E)** Representative micrographs of NeuN immunofluorescence in DG of the hippocampus, the magnification showed the region used to the thickness analyze. **(F)** Comparative analysis of thickness of NeuN positive immunoreactivity in the DG of the Hippocampus, Data were expressed as mean  $\pm$  S.E.M. Statistical analysis was performed by one-way ANOVA followed by Bonferroni post test. \*:  $P > 0.05$ . \*\*:  $P > 0.01$ . n=4 per 3xTg AD group.
