# Supplementary material for: Role of Liver X Receptor in AD Pathophysiology
Source: PubMed Central journal article supplement (PMC4697813; doi:10.1371/journal.pone.0145467), 2015-12-31
Supplement: pone.0145467.s004.pdf [file pone.0145467.s004.pdf]

**Figure S4.**

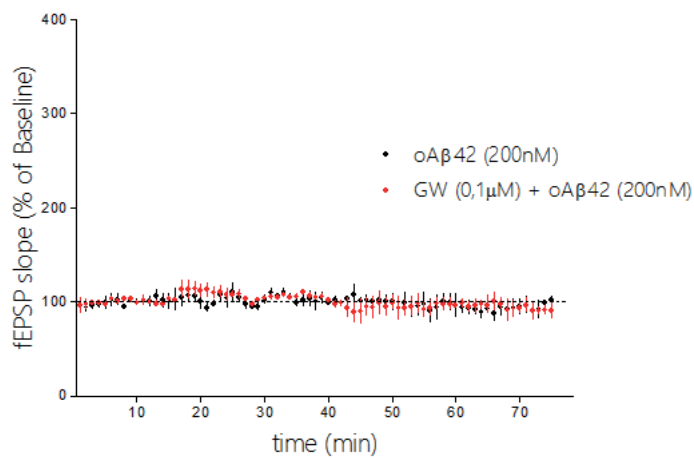

**Figure S4. High concentration of neither oAβ42 or oAβ42 plus GW3965 affect single evoked CA1 fEPSPs.** fEPSPs slope over time after the following treatments: 1) 200 nM oAβ42 [n=4--black dots] for 40 min and 2) 0.1 μM GW3965 (1 hour incubation before recording) and 40 min 200 nM oAβ42 [n=4—red dots].
