# Supplementary material for: Role of Liver X Receptor in AD Pathophysiology
Source: PubMed Central journal article supplement (PMC4697813; doi:10.1371/journal.pone.0145467), 2015-12-31
Supplement: pone.0145467.s005.pdf [file pone.0145467.s005.pdf]

**Figure S5.**

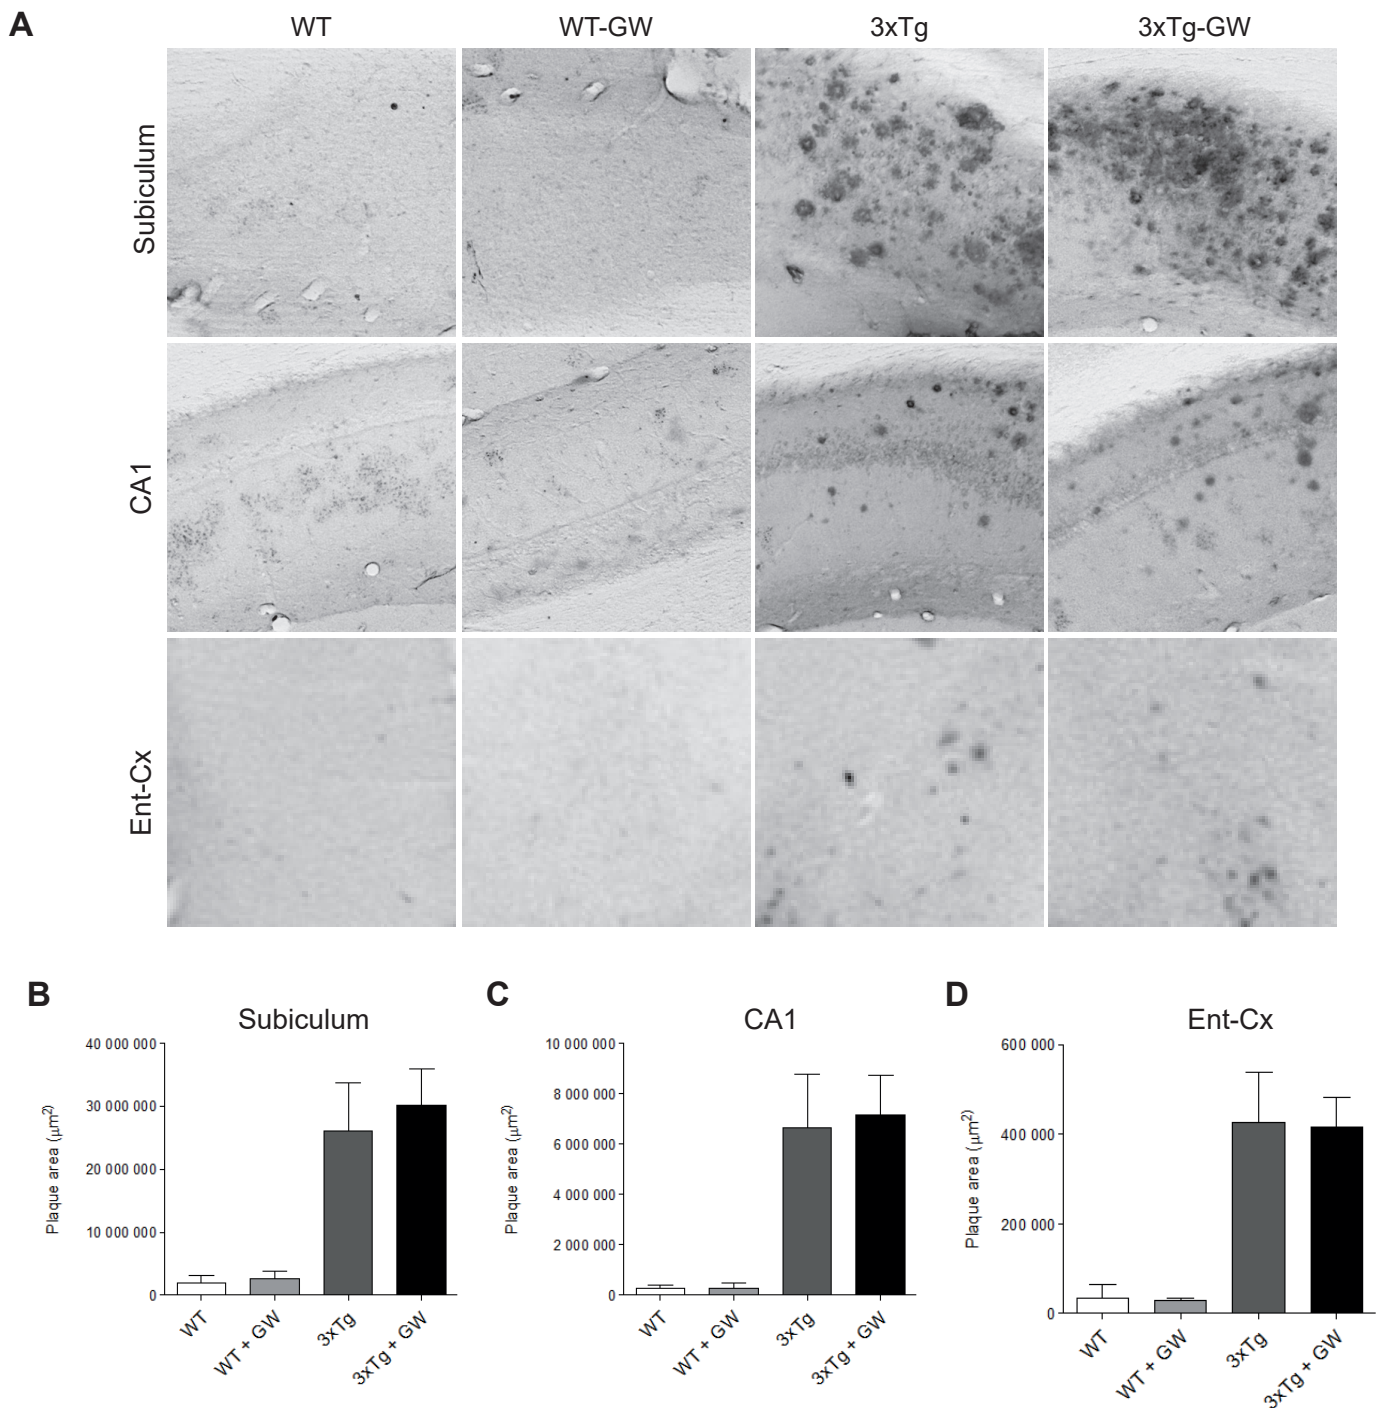

**Figure S5. GW3965 treatment did not reduce amyloid plaque area in Subiculum, CA1 of the hippocampus and Entorhinal cortex in 3xTg-AD mice.** Amyloid plaque deposition in brains of treated and untreated mice groups were evaluated by immunohistochemistry with antibody anti-A $\beta$  (6E10). (A) Representative pictograms of A $\beta$  immunohistochemistry from regions of interest; Subiculum, CA1 of the hippocampus and Entorhinal cortex. (B) Quantitative analysis of the data presented in A from Subiculum. (C) CA1 of the hippocampus and (D) Entorhinal cortex (Ent Cx). Not significant changes were found in A $\beta$  plaque area after GW3965 treatment in 3xTg-AD mice as compared with untreated 3xTg-AD mice. Data were expressed as mean  $\pm$  S.E.M. Statistical analysis was done by one way ANOVA followed by Tukey's multiple comparison test. Females, n=4 per group.
